# Supplementary material for: Overcoming of Microenvironment Protection on Primary Chronic Lymphocytic Leukemia Cells after Treatment with BTK and MDM2 Pharmacological Inhibitors
Source: MDPI journal article supplement (doi:10.3390/curroncol28040223), 2021-07-01

Original blot for Figure 1B-D

c-Myc

Pt.#1

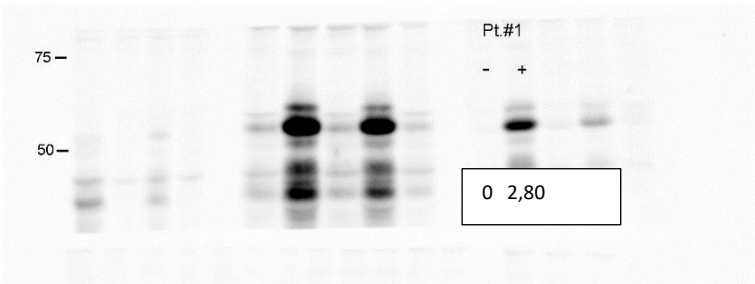

Pt.#5

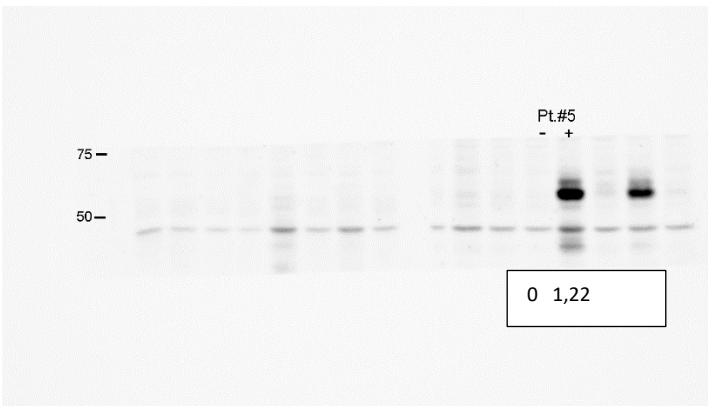

Pt.#7

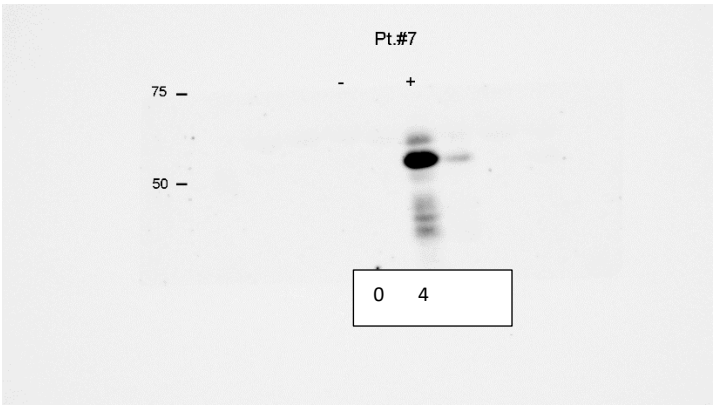

Pt.#8

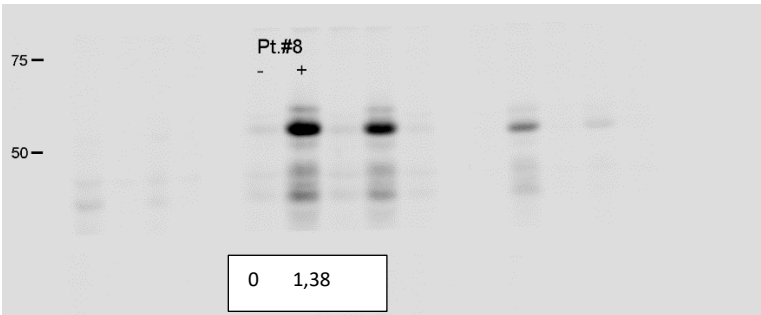

Pt.#10

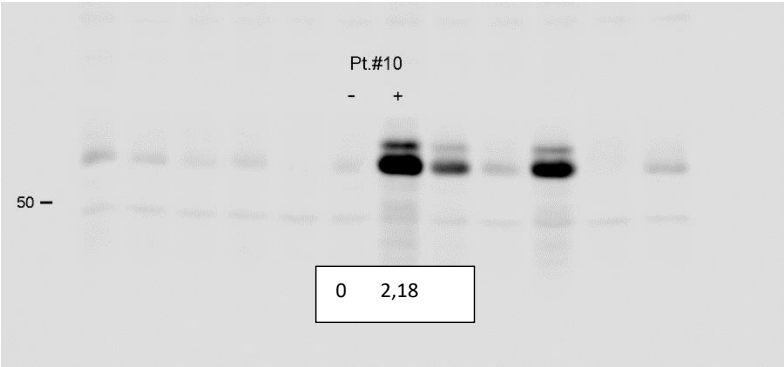

Pt.#11

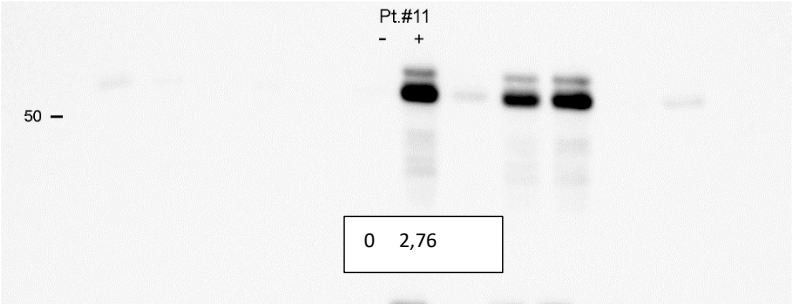

Pt.#12

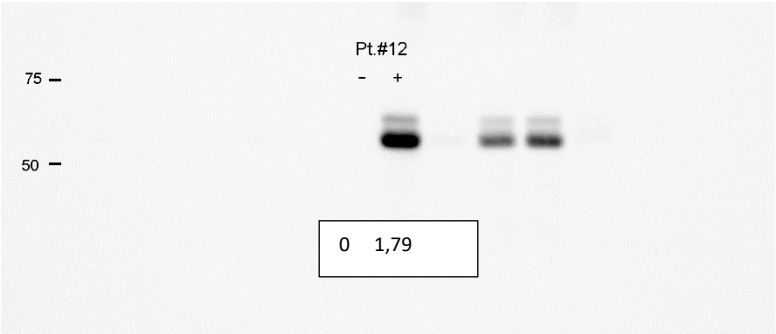

Pt.#16

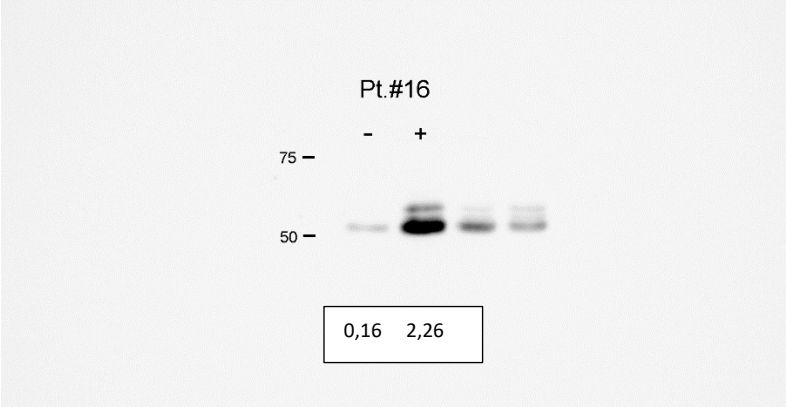

p53

Pt.#1

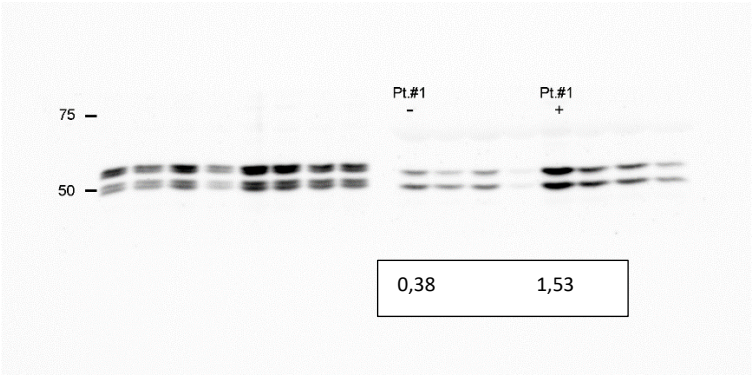

Pt.#5

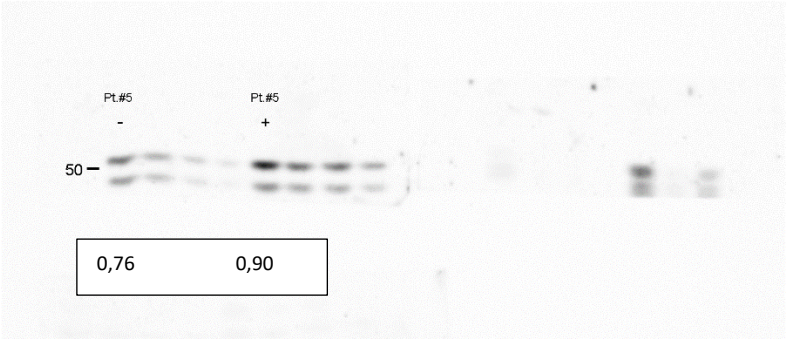

Pt.#8

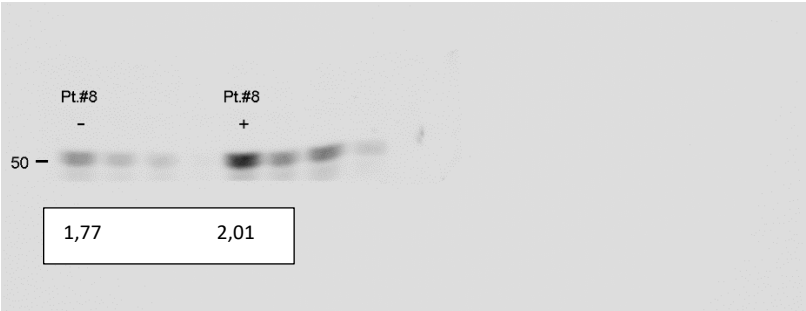

Pt.#10

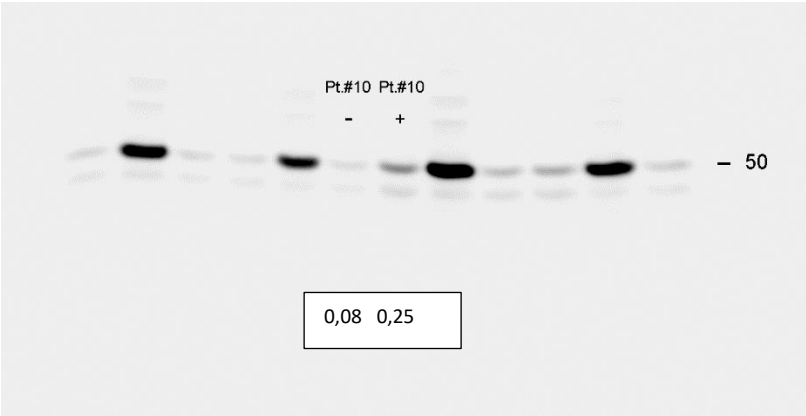

Pt.#11

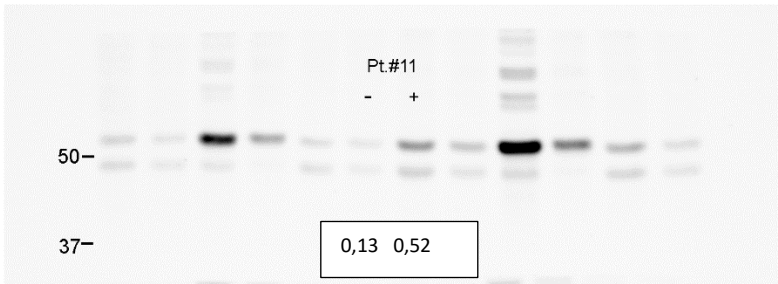

Pt.#12

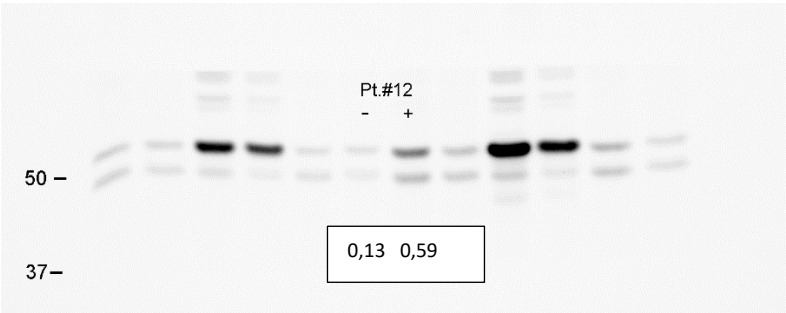

Pt.#16

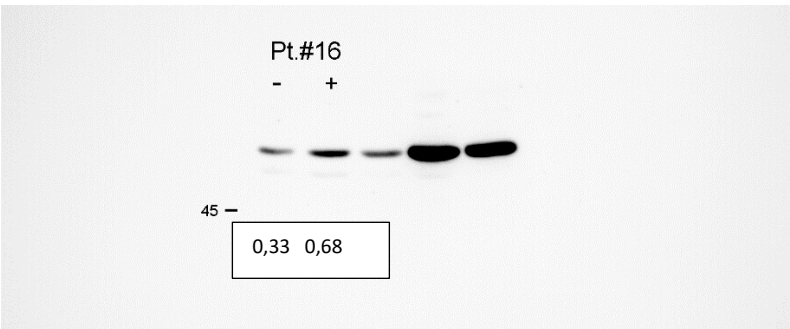

Actin

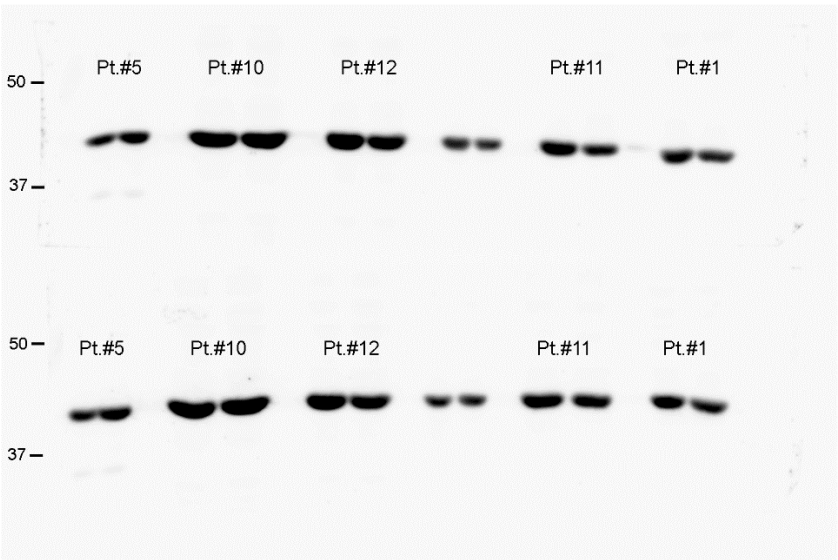

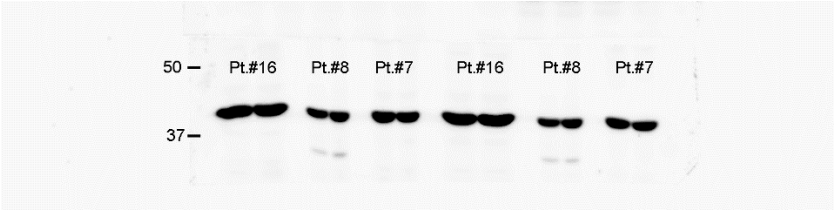

Original blot for Figure 2B

c-Myc

Pt.#10

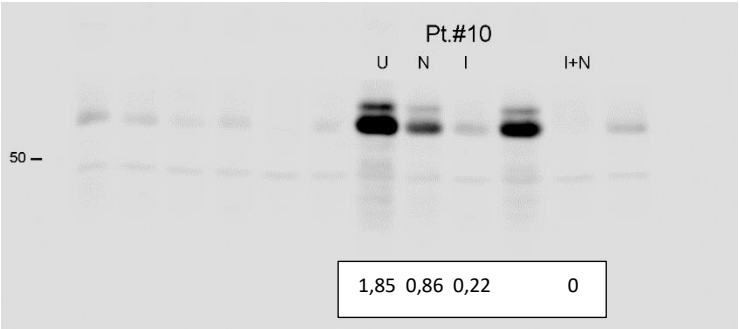

Pt.#11

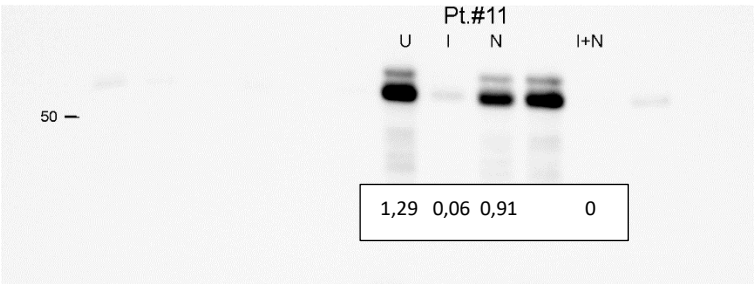

Pt.#12

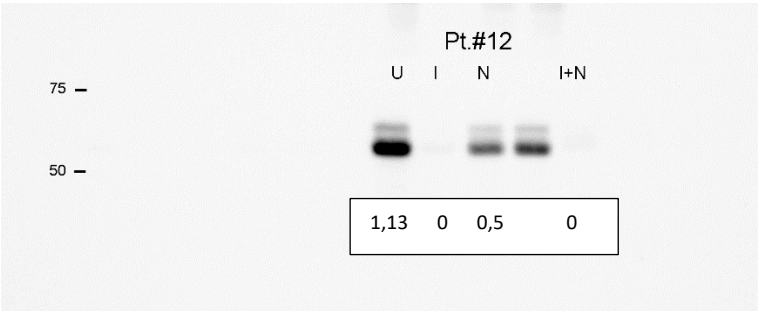

Pt.#13

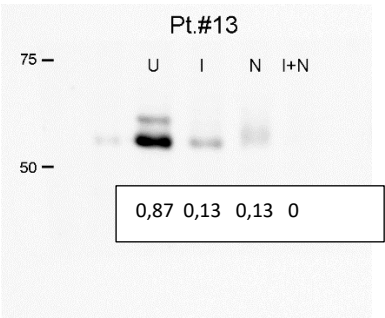

Pt.#14

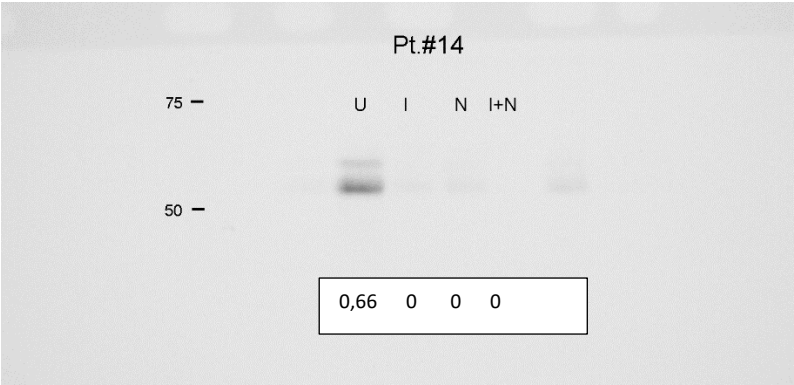

Actin

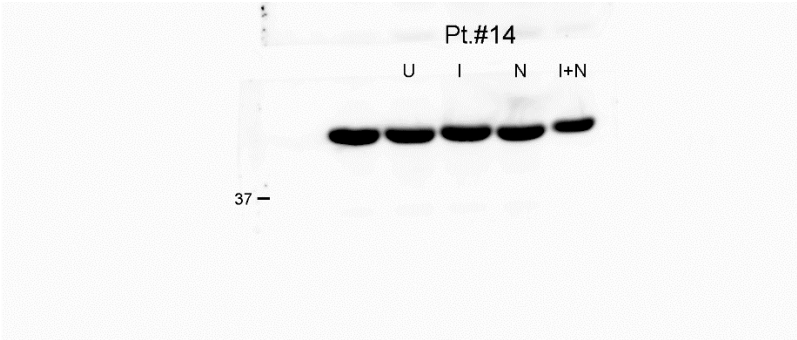

Pt.#16 c-Myc

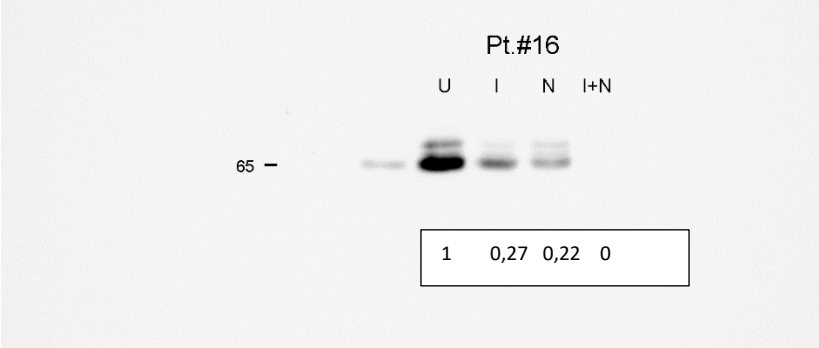

Actin

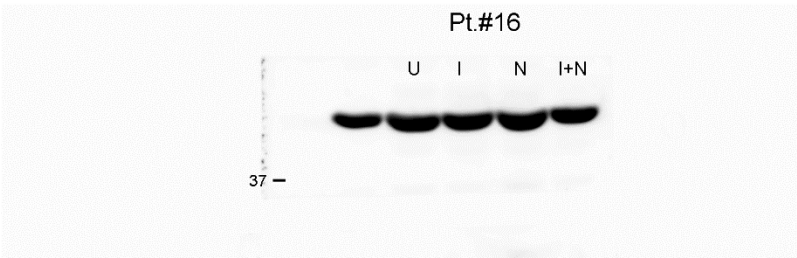

Original blot for Figure 3A

P53

Pt.#10

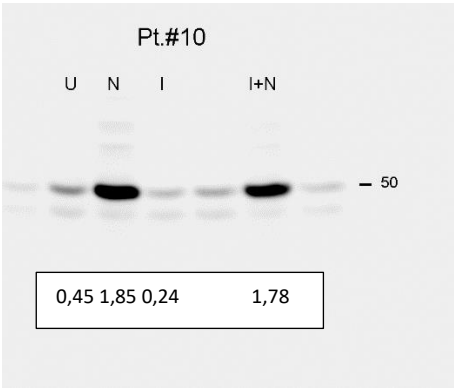

Pt.#11

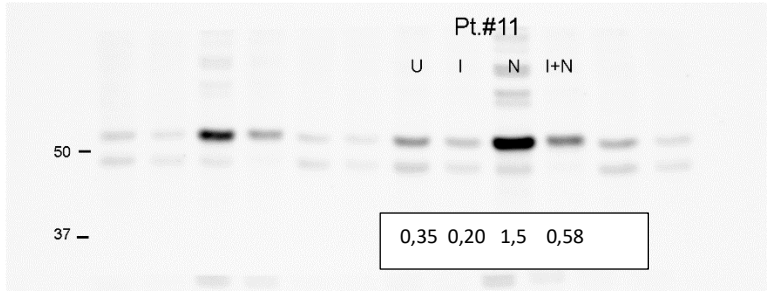

Pt.#12

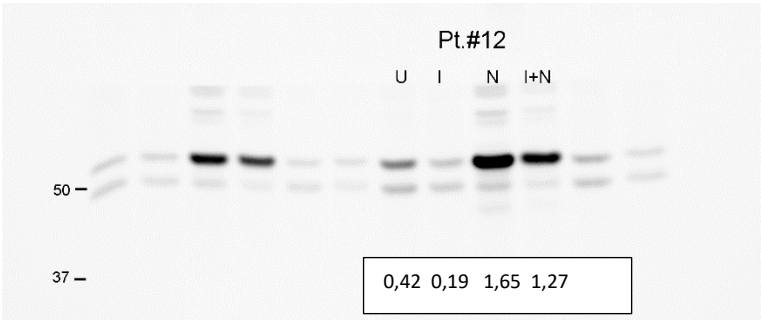

Pt.#13

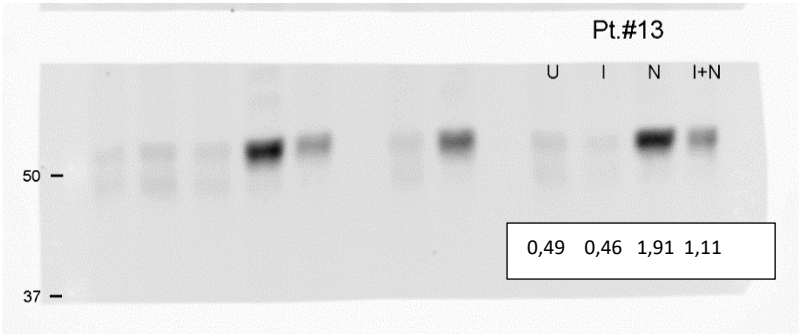

Pt.#14

c-Myc

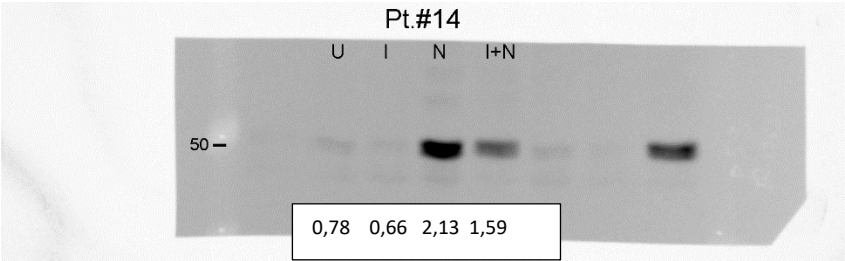

Actin

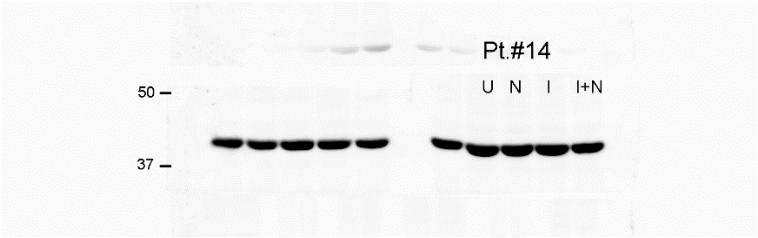

Pt.#16

c-Myc

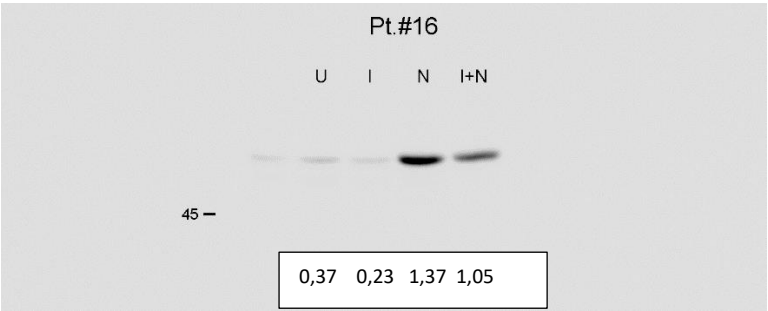

Actin

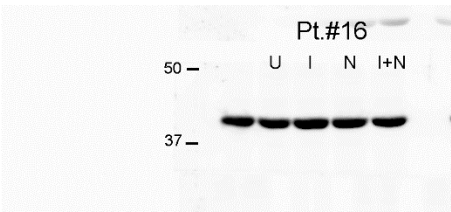

**Original blot for Figure 3C**

**Pt.#12**

P-p53 (Ser15)

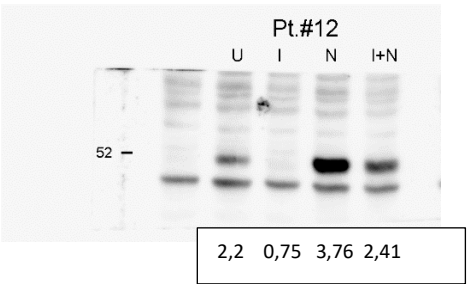



P-p53 (Ser392)

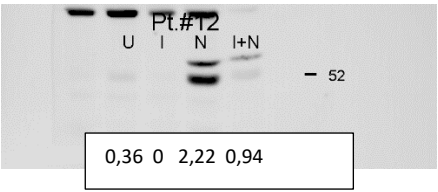

PUMA

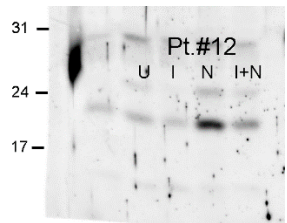

Actin

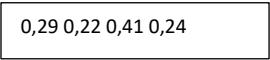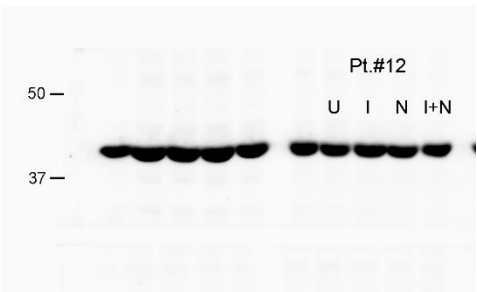

Pt.#16

P-p53 (Ser15)

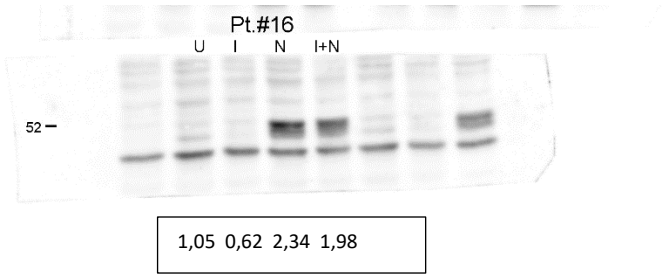

P-p53 (Ser392)

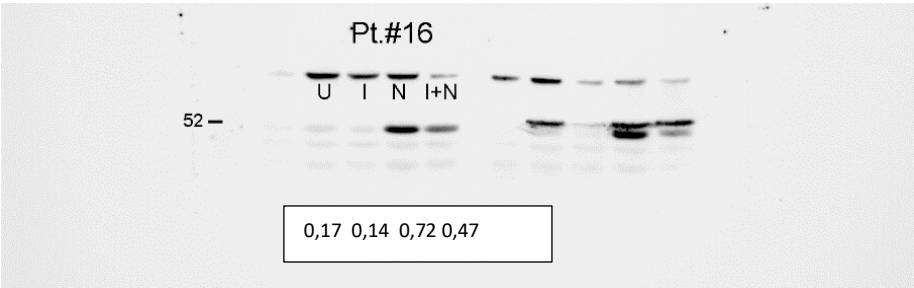

PUMA

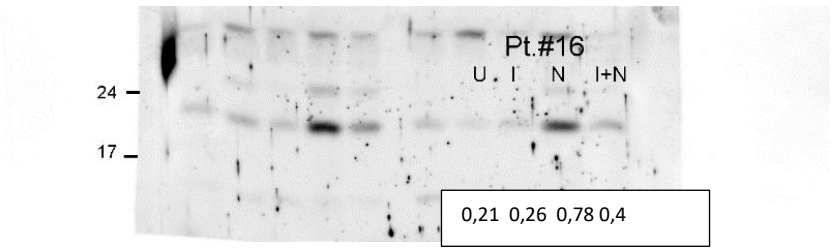

Actin

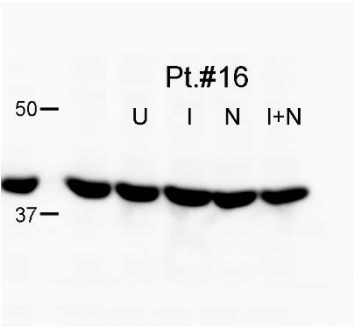

Original bot for Figure 4B

Pt.#12

Pro-Caspase 3

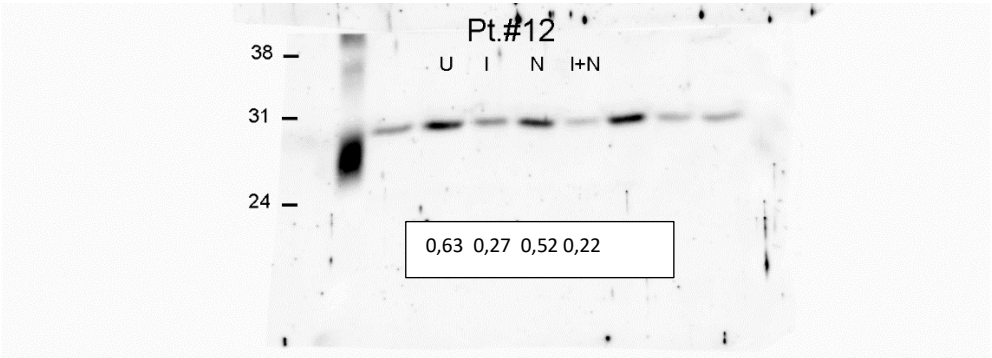

Pro-Caspase 9

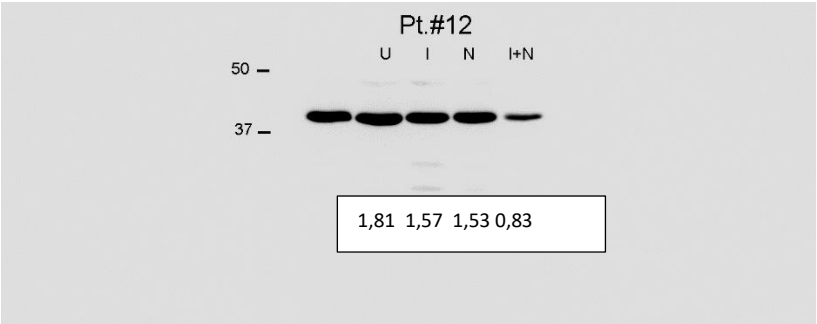

Actin

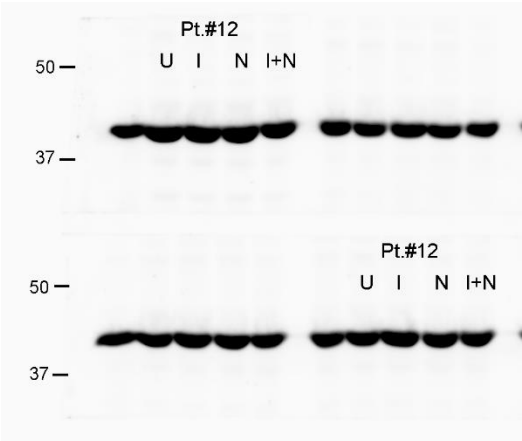

Pt.#16

Pro-Caspase 3

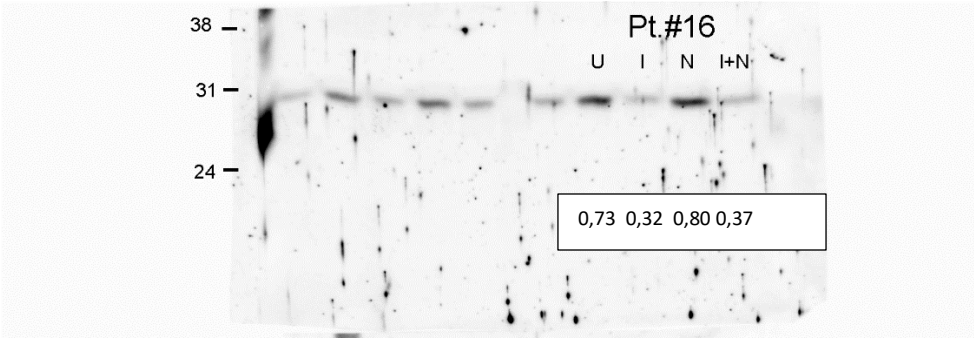

Pro-Caspase 9

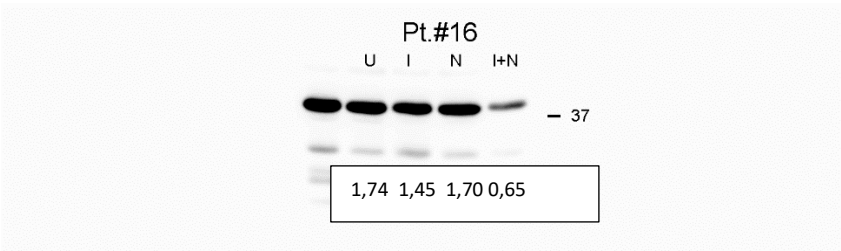

Actin

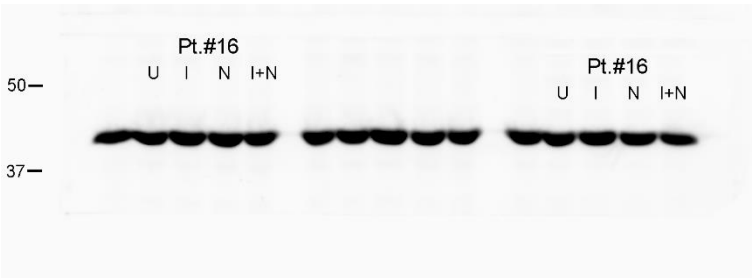

Original bot for Figure 4C

Pt.#12

P-BAD

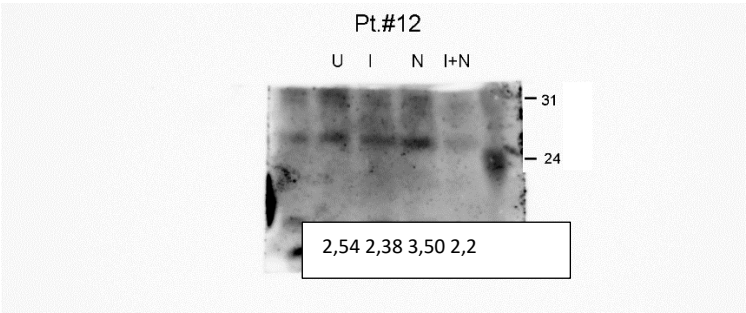

BAD

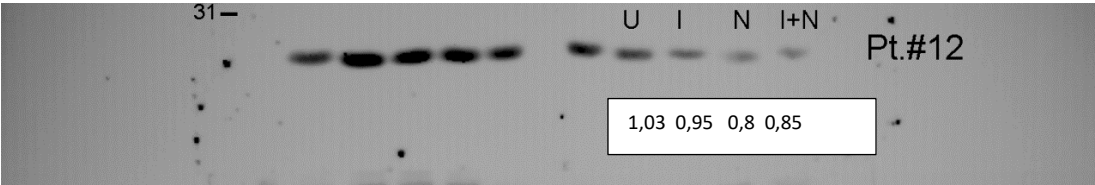

BAX

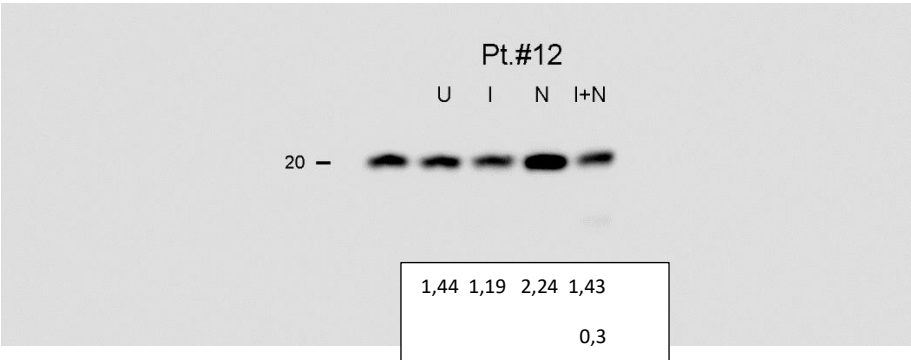

P-Akt

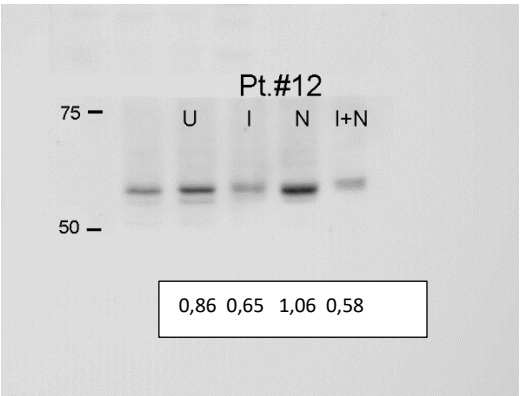

Akt

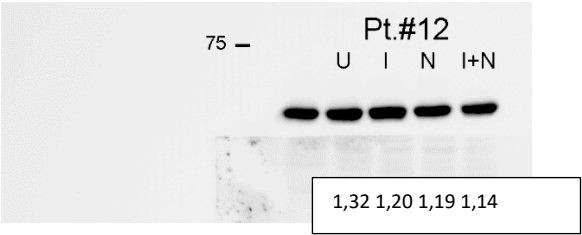

Actin

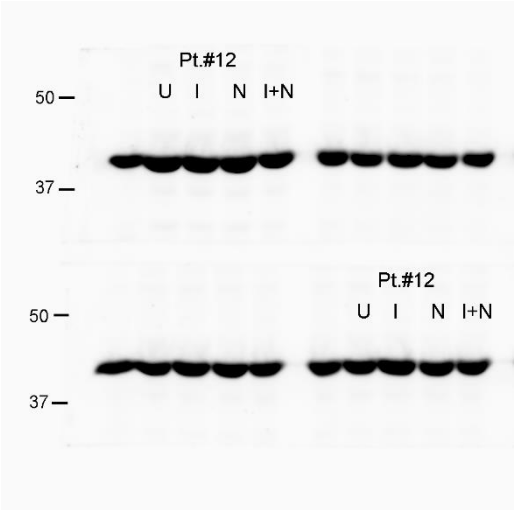

Pt.#16

P-BAD

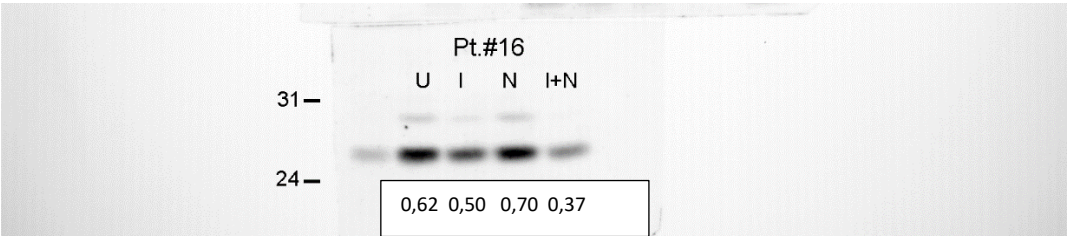

BAD

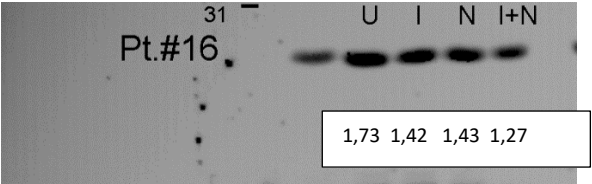

BAX

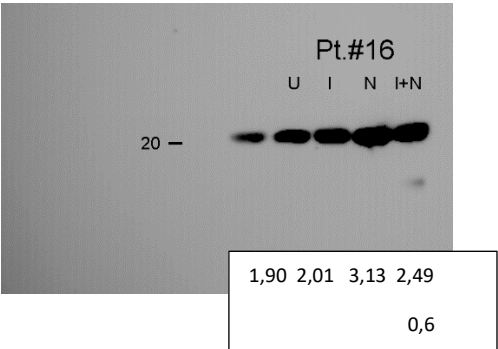

P-Akt

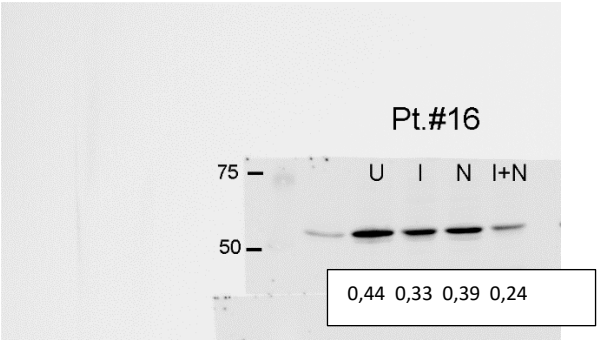

Akt

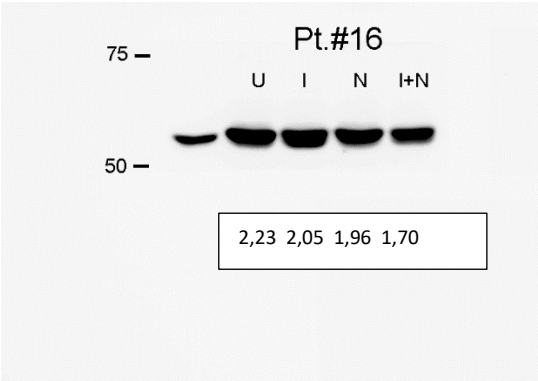

Actin

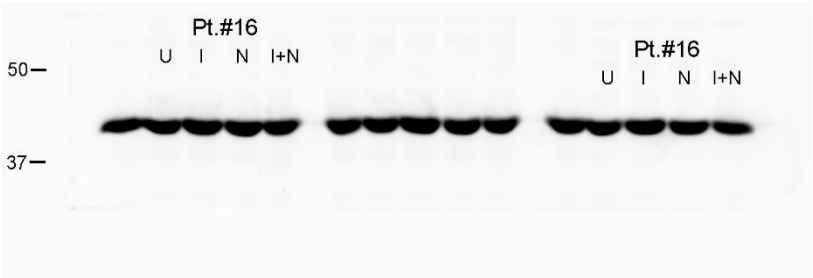

Supplement: s1 [file s1]
